# Supplementary material
Source: Springer Nature journal article supplement (https://www.springermedizin.de/resource/supplementary/13048_2014_249_MOESM1_ESM.pdf/9665232)

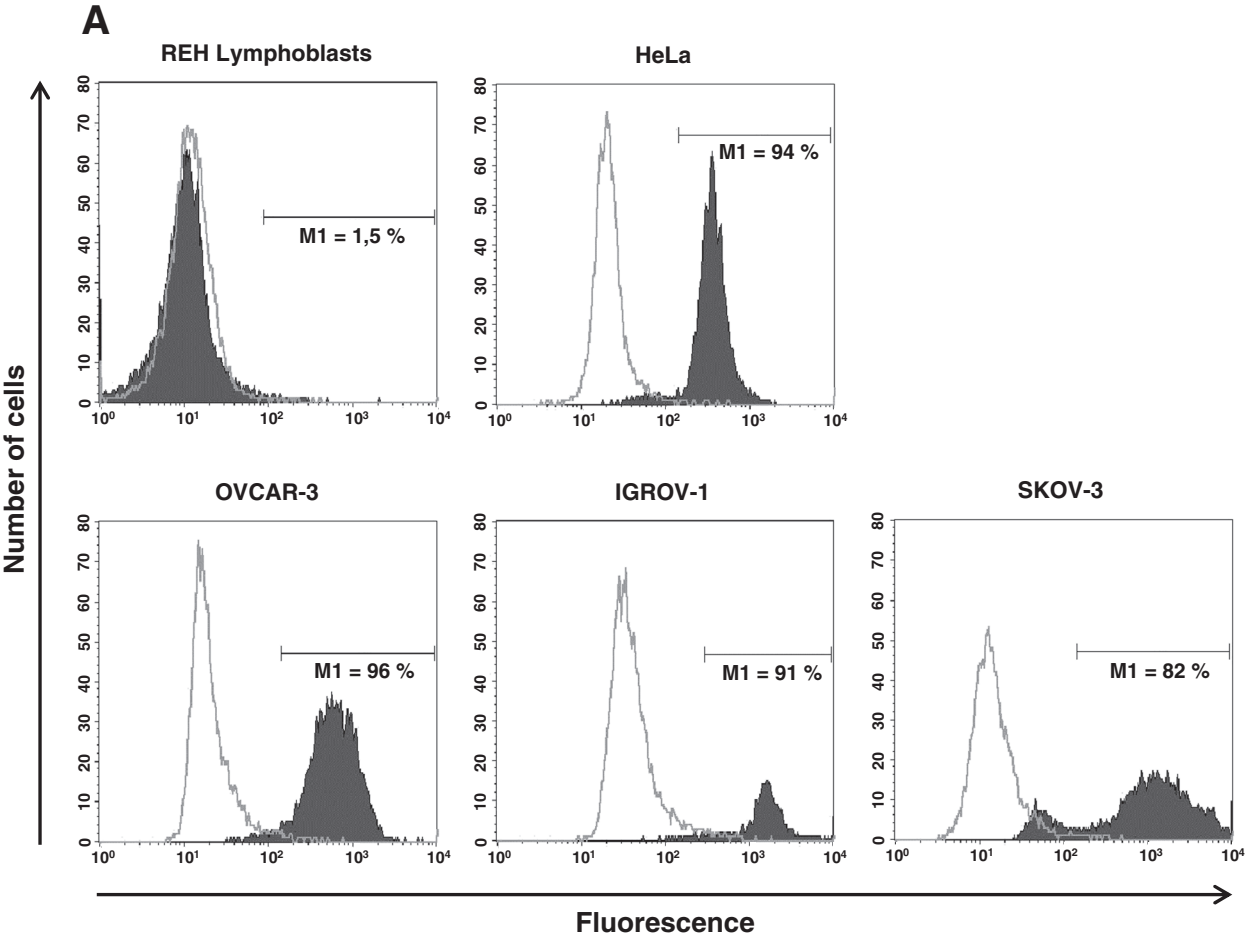

**B**

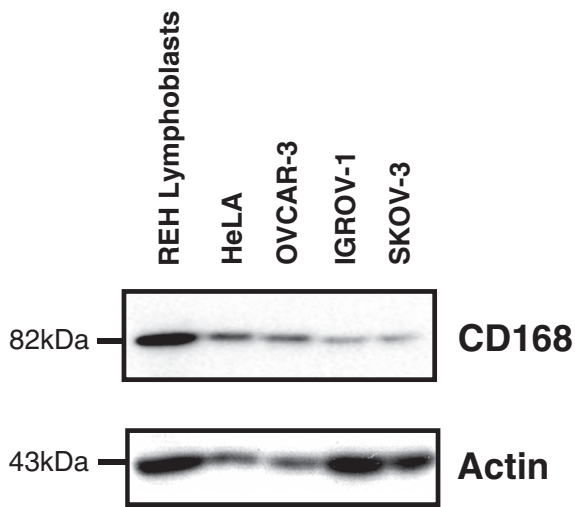

Supplement: MOESM1 [file 9665232]
